# Supplementary material
Source: Springer Nature journal article supplement (https://www.springermedizin.de/resource/supplementary/12936_2014_3535_MOESM3_ESM.pdf/9545862)

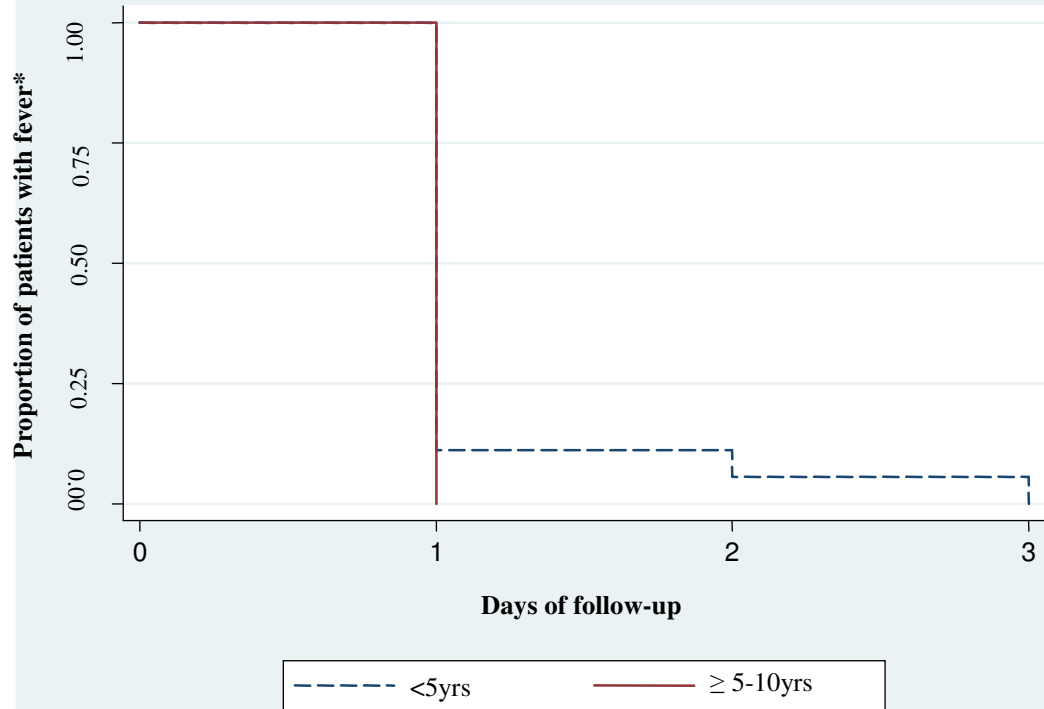

\*Fever = axillary temperature  $\geq 37.5^{\circ}\text{C}$

Supplement: MOESM3 [file 9545862]
